# Supplementary material for: Genomic landscape of hepatocellular carcinoma in Egyptian patients by whole exome sequencing
Source: PubMed Central journal article supplement — BMC Med Genomics. 2024 Aug 9;17:202. doi: 10.1186/s12920-024-01965-w (PMC11311965; doi:10.1186/s12920-024-01965-w), 2024-08-09
Supplement: 12920_2024_1965_MOESM1_ESM.pdf [file 12920_2024_1965_MOESM1_ESM.pdf]

*Supplement Table (1): Concentration and purity for extracted DNA from tissue samples L=Non-HCC, T=HCC using Qubit and Nanodrop*

| Sample ID (Extracted DNA) | Sample Type  | Concentration (ng/uL) Qubit | Purity NanoDrop |
|---------------------------|--------------|-----------------------------|-----------------|
| LT2 117T HCC              | FFPE         | 33.8                        | 2.09            |
| LT2 117L Non-HCC          | FFPE         | 69.8                        | 1.93            |
| LT6 1807 T HCC            | FFPE         | 116                         | 2.03            |
| LT6 1807 L Non-HCC        | FFPE         | 120                         | 2.07            |
| LT7 1617 T HCC            | FFPE         | 21                          | 2.2             |
| LT7 1617 L Non-HCC        | FFPE         | 26                          | 1.98            |
| LT8 2158T HCC             | FFPE         | 47.4                        | 2               |
| LT8 2158L Non-HCC         | FFPE         | 52.2                        | 2               |
| LT9 HCC HBV               | Fresh Tissue | 55.8                        | 1.91            |
| LT9 Non HCC HBV           | Fresh Tissue | 35.5                        | 1.9             |
| LT10 HCC                  | Fresh Tissue | 75.2                        | 1.75            |
| LT10 Non HCC              | Fresh Tissue | 49.8                        | 1.72            |
| LT11 Budd-Chiari HCC      | Fresh Tissue | 72.4                        | 1.77            |
| LT11 Budd-Chiari Non HCC  | Fresh Tissue | 42.4                        | 1.9             |
| LT12 HCC                  | Fresh Tissue | 11.3                        | 1.7             |
| LT12 Non HCC              | Fresh Tissue | 26.4                        | 1.89            |
| LT13 HCC HBV              | Fresh Tissue | 32.6                        | 1.6             |
| LT13 NonHCC HBV           | Fresh Tissue | 35                          | 1.5             |
| LT14 HCC                  | Fresh Tissue | 68.2                        | 1.91            |
| LT14 Non HCC              | Fresh Tissue | 52                          | 1.8             |
| LT15 HCC                  | Fresh Tissue | 0.23*                       | 1.66            |
| LT15 Non HCC              | Fresh Tissue | 100                         | 1.8             |
| LT16 HCC                  | Fresh Tissue | 95.2                        | 1.99            |
| LT16 Non HCC              | Fresh Tissue | 56                          | 2.1             |
| LT17 HCC                  | Fresh Tissue | 80.2                        | 2               |
| LT17 Non HCC              | Fresh Tissue | 28.8                        | 1.94            |
| LT18 HCC                  | Fresh Tissue | 22.8                        | 2.1             |
| LT18 Non HCC              | Fresh Tissue | 14.8                        | 1.9             |
| LT19 HCC                  | Fresh Tissue | 100.4                       | 2.0             |
| LT19 Non HCC              | Fresh Tissue | 56.4                        | 1.87            |
| LT20 HCC                  | Fresh Tissue | 127.6                       | 1.89            |
| LT20 Non HCC              | Fresh Tissue | 74.4                        | 1.95            |

Supplement Table (2): Variants number with pathogenic, synonymous, and intron variants in HCC samples

|    | HCC  | Variants no | Missense | frameshift truncation | Stop-gained | splice site | Synonymous | Other |
|----|------|-------------|----------|-----------------------|-------------|-------------|------------|-------|
| 1  | LT2  | 187         | 61       | 3                     | 7           | 1           | 53         | 62    |
| 2  | LT6  | 9328        | 2195     | 169                   | 98          | 34          | 2276       | 4556  |
| 3  | LT7  | 17884       | 4816     | 193                   | 281         | 103         | 4432       | 8059  |
| 4  | LT8  | 3007        | 989      | 71                    | 47          | 9           | 867        | 1024  |
| 5  | LT10 | 28788       | 4091     | 507                   | 43          | 66          | 4970       | 19111 |
| 6  | LT11 | 44275       | 6863     | 689                   | 63          | 80          | 7809       | 28771 |
| 7  | LT13 | 34846       | 5624     | 1972                  | 59          | 35          | 6797       | 20359 |
| 8  | LT14 | 37328       | 5400     | 919                   | 67          | 97          | 6251       | 24594 |
| 9  | LT16 | 37467       | 6138     | 766                   | 63          | 65          | 7200       | 23235 |
| 10 | LT17 | 27847       | 4564     | 723                   | 39          | 48          | 5562       | 16911 |
| 11 | LT18 | 12352       | 2086     | 211                   | 13          | 25          | 2401       | 7616  |
| 12 | LT19 | 32876       | 5612     | 495                   | 74          | 70          | 6263       | 20362 |
| 13 | LT20 | 32910       | 5349     | 560                   | 57          | 52          | 6159       | 20733 |

Supplement Table (3): Percentage of pathogenic variants in HCC samples FFPE and fresh tissue

| Sample/% of variants |        | Missense % | frameshift % | Stop-gained % | Splice site % | Synonymous % | Other % |
|----------------------|--------|------------|--------------|---------------|---------------|--------------|---------|
| FFPE                 | Median | 29.8       | 1.7          | 1.6           | 0.4           | 26.6         | 39.6    |
|                      | Q1     | 26.1       | 1.5          | 1.4           | 0.3           | 24.7         | 33.8    |
|                      | Q3     | 32.7       | 1.9          | 2.1           | 0.5           | 28.5         | 46.0    |
| Fresh Tissue         | Median | 29.8       | 1.7          | 1.6           | 0.4           | 26.6         | 39.6    |
|                      | Q1     | 27.9       | 1.6          | 1.5           | 0.4           | 25.6         | 36.7    |
|                      | Q3     | 31.2       | 1.8          | 1.8           | 0.5           | 27.5         | 42.8    |

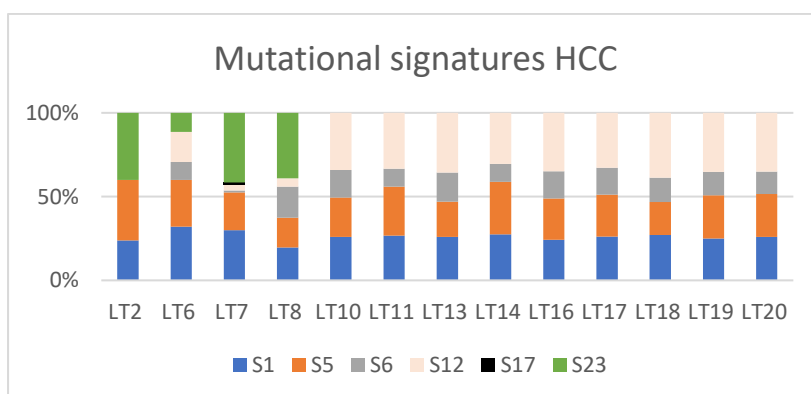

Supplement Figure (1): Mutational signatures % in HCC samples

*Supplement Table (4) : Percentage of mutational signatures in HCC samples*

| Samples                  | S1    | S5    | S6    | S12   | S17  | S23   |
|--------------------------|-------|-------|-------|-------|------|-------|
| LT2 HCC                  | 23.9% | 36.1% |       |       |      | 40%   |
| LT6 HCC                  | 25.7% | 22.2% | 8.6%  | 14.4  |      | 9.1%  |
| LT7 HCC                  | 30%   | 22.5% | 1.1%  | 3.4%  | 1.4% | 41.5% |
| LT8 HCC                  | 19.7% | 17.8% | 18.5% | 4.9%  |      | 39.1% |
| LT10 HCC                 | 26%   | 23.4% | 16.5% | 34.1% |      |       |
| LT11 HCC                 | 26.6% | 29.2% | 10.7% | 33.4% |      |       |
| LT13 HCC                 | 26%   | 20.9% | 17.4% | 35.6% |      |       |
| LT14 HCC                 | 27.4% | 31.5% | 10.7% | 30.4% |      |       |
| LT16 HCC                 | 24.3% | 24.5% | 16.3% | 34.9% |      |       |
| LT17 HCC                 | 26.1% | 25.2% | 15.9% | 32.9% |      |       |
| LT18 HCC                 | 27.2% | 19.7% | 14.5% | 38.7% |      |       |
| LT19 HCC                 | 24.9% | 25.9% | 14%   | 35.2% |      |       |
| LT20 HCC                 | 26%   | 25.5% | 13.4% | 35.1% |      |       |
| Median                   | 26%   | 24.5% | 14.2% | 34.5% | 1.4% | 39.5% |
| 1 <sup>st</sup> quartile | 24.9  | 22.2  | 10.7  | 32.3  |      | 31.6  |
| 3 <sup>rd</sup> quartile | 0.266 | 0.259 | 16.3  | 35.3  |      | 40.4  |

*Supplement Table (5): Pathogenic variants in highly mutated genes in HCC*

| High mutated | complex_substitution | frameshift_truncation | missense | splice_site | stop_gained | Grand Total |
|--------------|----------------------|-----------------------|----------|-------------|-------------|-------------|
| AHNAK2       | 31                   | 6                     | 131      |             |             | 168         |
| MUC6         | 25                   | 1                     | 91       |             | 1           | 118         |
| MUC16        | 1                    | 10                    | 95       |             |             | 106         |
| TTN          | 4                    | 22                    | 72       | 2           |             | 100         |
| ZNF717       | 12                   | 4                     | 71       |             | 3           | 90          |
| FLG          | 10                   | 2                     | 77       |             |             | 89          |
| MUC12        | 3                    | 2                     | 80       |             | 1           | 86          |
| OBSCN        | 2                    | 4                     | 55       | 1           | 1           | 63          |
| PDE4DIP      | 1                    | 7                     | 45       |             | 5           | 58          |
| MUC5B        | 3                    | 8                     | 46       |             |             | 57          |
| HYDIN        | 1                    | 4                     | 38       | 1           | 1           | 45          |
| Total        | 93                   | 70                    | 801      | 4           | 12          | 980         |

Supplement Table (6): Pathogenic variants in highly mutated genes in Non-HCC

| Genes Non-HCC      | complex_substitution | frameshift_truncation | missense   | stop_gained | Grand Total |
|--------------------|----------------------|-----------------------|------------|-------------|-------------|
| AHNAK2             | 23                   | 2                     | 114        | 1           | 140         |
| MUC6               | 28                   | 1                     | 94         |             | 123         |
| MUC16              | 4                    | 3                     | 97         |             | 104         |
| FLG                | 11                   |                       | 72         |             | 83          |
| MUC12              | 3                    | 3                     | 65         | 1           | 72          |
| ZNF717             | 13                   | 2                     | 56         | 1           | 72          |
| MUC17              | 7                    | 1                     | 54         |             | 62          |
| OBSCN              | 2                    | 4                     | 51         |             | 57          |
| PDE4DIP            | 1                    | 4                     | 39         | 6           | 50          |
| TTN                | 1                    | 10                    | 35         |             | 46          |
| <b>Grand Total</b> | <b>93</b>            | <b>30</b>             | <b>677</b> | <b>9</b>    | <b>809</b>  |

Supplement Table (7): Unique Pathogenic mutations in oncogenes and tumor suppressor genes in HCC samples.

| Row Labels            | Oncogene   | TSG        | Grand Total |      |
|-----------------------|------------|------------|-------------|------|
| Frameshift_truncation | 31         | 49         | 80          | 37%  |
| Missense              | 48         | 84         | 132         | 60%  |
| Splice_site_variant   |            | 1          | 1           | 0.3% |
| Stop_gained           | 2          | 4          | 6           | 2.7% |
| <b>Grand Total</b>    | <b>81</b>  | <b>138</b> | <b>219</b>  |      |
|                       | <b>37%</b> | <b>63%</b> |             |      |

Supplement Table (8): Unique pathogenic variants medium to high confidence (Franklin), missense sorted according to CHASMPplus LIHC (Hepatocellular carcinoma) score in HCC samples, with Tier 1&2 genes & variants shown in red.

| Chr   | Pos       | Ref | Alt | Gene    | Sequence_ontology | cDNA      | Protein      | Sample | Class/ACMG category | CHASMPplus Score | CHASMPplus LIHC Score | Target Recommended_Therapy                                                  | Phred  | Zygotity /VAF |
|-------|-----------|-----|-----|---------|-------------------|-----------|--------------|--------|---------------------|------------------|-----------------------|-----------------------------------------------------------------------------|--------|---------------|
| chr17 | 7578508   | C   | T   | TP53    | missense          | c.422G>A  | p.Cys141Tyr  | LT19   | TSG/ Tier 1         | 0.78             | 0.716                 | Weel inhibitors, Chk1 inhibitors, kevetrin, APR-246, nutlins, gene therapy/ | 101.81 | het/22.95%    |
| chr5  | 112176756 | T   | A   | APC     | missense          | c.5465T>A | p.Val1822Asp | LT16   | TSG/ Tier 3         | 0.489            | 0.378                 | WNT inhibitors                                                              | 1099.3 | het/          |
| chr9  | 21974732  | A   | T   | CDKN2A  | missense          | c.95T>A   | p.Leu32Gln   | LT14   | TSG/ Tier 1         | 0.551            | 0.37                  | CDK4/6 inhibitors                                                           | 25.12  | het/7.14%     |
| chr17 | 41222975  | C   | T   | BRCA1   | missense          | c.4956G>A | p.Met1652Ile | LT13   | TSG/ Tier 3         | 0.432            | 0.111                 | PARP Inhibitor                                                              | 345.35 | het           |
| chr12 | 49446736  | G   | C   | KMT2D   | missense          | c.1074C>G | p.Ile358Met  | LT13   | TSG/ Tier 3         | 0.222            | 0.107                 |                                                                             | 1100.7 | het           |
| chr17 | 41244524  | C   | T   | BRCA1   | missense          | c.3024G>A | p.Met1008Ile | LT20   | TSG/ Tier 3         | 0.391            | 0.095                 | PARP Inhibitor                                                              | 417.04 | het           |
| chr11 | 108143456 | C   | G   | ATM     | missense          | c.3161C>G | p.Pro1054Arg | LT16   | TSG/ Tier 3         | 0.277            | 0.093                 | PARP Inhibitors                                                             | 252.03 | het           |
| chr12 | 49445173  | C   | G   | KMT2D   | missense          | c.2293G>C | p.Ala765Pro  | LT6    | TSG/ Tier 3         | 0.166            | 0.084                 |                                                                             | 190.62 | het           |
| chr18 | 42529996  | G   | C   | SETBP1  | missense          | c.691G>C  | p.Val231Leu  | LT17   | Oncogene/Tier 3     | 0.085            | 0.061                 |                                                                             | 805.6  | het           |
| chr6  | 138202173 | G   | A   | TNFAIP3 | missense          | c.2090G>A | p.Arg697Lys  | LT14   | TSG/Tier 3          | 0.119            | 0.058                 |                                                                             | 427.33 | het           |
| chr4  | 55139771  | T   | C   | PDGFR A | missense          | c.1432T>C | p.Ser478Pro  | LT11   | Oncogene/Tier 3     | 0.044            | 0.052                 | Imatininb                                                                   | 1653.6 | het           |
| chr9  | 98278940  | C   | G   | PTCH1   | missense          | c.163G>C  | p.Asp55His   | LT17   | TSG/ Tier 3         | 0.12             | 0.051                 | Vismodegib, hedgehog inhibitors                                             | 1045.1 | hom           |
| chr21 | 36164866  | G   | A   | RUNX1   | missense          | c.1009C>T | p.Pro337Ser  | LT8    | TSG/Tier 3          | 0.268            | 0.031                 |                                                                             | 35.98  | het           |
| chr2  | 29416757  | A   | G   | ALK     | missense          | c.4196T>C | p.Ile1399Thr | LT14   | Oncogene/Tier 3     | 0.083            | 0.03                  | Crizotinib, ALK inhibitor                                                   | 1047.1 | het           |
| chr4  | 55604655  | G   | T   | KIT     | missense          | c.2863G>T | p.Val1955Leu | LT20   | Oncogene/Tier 3     | 0.072            | 0.03                  | Imatinib, Sunitinib, Novel                                                  | 331.09 | het           |

|                   |          |   |            |                 |                        |                          |      |                     |       |       |                                               |                       |            |                |
|-------------------|----------|---|------------|-----------------|------------------------|--------------------------|------|---------------------|-------|-------|-----------------------------------------------|-----------------------|------------|----------------|
|                   |          |   |            |                 |                        |                          |      |                     |       |       |                                               | KIT<br>Inhibitor<br>s |            |                |
| chr10<br>8100506  | C        | G | GATA3      | missense        | c.480C>Gg              | p.Asp160Glu              | LT10 | TSG/Tier 3          | 0.082 | 0.03  |                                               |                       | 708.<br>35 | het            |
| chr11<br>64575505 | C        | T | MEN1       | missense        | c.512G>A               | p.Arg171Gln              | LT17 | TSG/Tier 4          | 0.094 | 0.029 |                                               |                       | 406.<br>55 | het            |
| chr13<br>28608473 | C        | T | FLT3       | missense        | c.1669G>A              | p.Val557Ile              | LT17 | Oncogene/<br>Tier 4 | 0.061 | 0.026 | Sunitinib<br>,<br>FLT3<br>inhibitor<br>s      |                       | 319.<br>57 | het            |
| chr7<br>151859683 | G        | A | KMT2C      | missense        | c.10979C>T             | p.Ser3660Leu             | LT17 | TSG/Tier 4          | 0.169 | 0.025 |                                               |                       | 364.<br>98 | het            |
| chr7<br>128843411 | G        | A | SMO        | missense        | c.518G>A               | p.Arg173His              | LT17 | Oncogene/Ti<br>er3  | 0.034 | 0.024 | Vismodegi<br>b,<br>hedgehog<br>inhibitor<br>s |                       | 869.<br>81 | het            |
| chr4<br>106155751 | G        | A | TET2       | missense        | c.715G>A               | p.Val239Met              | LT13 | TSG/Tier3           | 0.073 | 0.012 |                                               |                       | 1058<br>.8 | het            |
| chr4<br>106196951 | A        | G | TET2       | missense        | c.5347A>G              | p.Ile1783Val             | LT18 | TSG/Tier3           | 0.06  | 0.012 |                                               |                       | 603.<br>05 | het            |
| chr4<br>106197000 | A        | G | TET2       | missense        | c.5396A>G              | p.His1799Arg             | LT19 | TSG/Tier3           | 0.054 | 0.011 |                                               |                       | 312.<br>12 | het            |
| chr3<br>138665029 | G        | C | FOXL2      | missense        | c.536C>G               | p.Ala179Gly              | LT11 | Oncogene/<br>Tier4  | 0.02  | 0.003 |                                               |                       | 314.<br>8  | het            |
| chr2<br>16082320  | CG       | - | MYCN       | frameshif<br>t  | c.134_135del           | p.Pro45ArgfsTer9         | LT11 | Oncogene/<br>Tier 3 |       |       |                                               |                       | 53.2<br>23 | het            |
| chr2<br>47630385  | T        | - | MSH2       | frameshif<br>t  | c.56del                | p.Phe19SerfsTer4<br>5    | LT13 | TSG /Tier 2         |       |       |                                               |                       | 37.5<br>58 | het/18.1<br>8% |
| chr9<br>37020775  | C        | - | PAX5       | frameshif<br>t  | c.76del                | p.Val26PhefsTer3         | LT13 | TSG /Tier 3         |       |       |                                               |                       | 50.7<br>09 | het            |
| chr16<br>3778897  | GC       | - | CREBB<br>P | frameshif<br>t  | c.6150_6151del         | p.Arg2052AspfsTe<br>r288 | LT13 | TSG/ Tier 3         |       |       |                                               |                       | 251.<br>17 | het            |
| chr16<br>68856088 | CG       | T | CDH1       | frameshif<br>t  | c.1896_1897del<br>insT | p.Ala634ArgfsTer<br>19   | LT13 | TSG/Tier 3          |       |       |                                               |                       | 801.<br>03 | het            |
| chr2<br>48033792  | TAA<br>C | - | MSH6       | splice_si<br>te | c.4001+12_4001+15del   |                          | LT19 | TSG /Tier 4         |       |       |                                               |                       | 973.<br>56 | het            |

Supplement Table (9): Unique pathogenic variants sorted with medium to high confidence (Franklin), missense sorted according to CHASMplus LIHC (Hepatocellular carcinoma) score in Non-HCC samples

| Chro  | Pos       | Ref | Alt | Gene   | Sequence_Ontology | cDNA_change | Protein_Change | Sample | Class/ACMG category | CHASM plus Score | LIHC Score | Recommended_Therapy                                      | Phred  | Zygotity |
|-------|-----------|-----|-----|--------|-------------------|-------------|----------------|--------|---------------------|------------------|------------|----------------------------------------------------------|--------|----------|
| chr12 | 121416864 | C   | T   | HNF1A  | missense          | c.293C>T    | p.Ala98Val     | LT19N  | TSG/ Tier3          | 0.149            | 0.324      |                                                          | 435.99 | het      |
| chr17 | 29653218  | T   | C   | NF1    | missense          | c.5216T>C   | p.Val1739Ala   | LT14N  | TSG/ Tier3          | 0.562            | 0.275      | PI3K/AKT/MTOR inhibitors, RAF inhibitors, MEK inhibitors | 379.39 | het      |
| chr22 | 41573602  | G   | T   | EP300  | missense          | c.5887G>T   | p.Ala1963Ser   | LT10N  | TSG/ Tier3          | 0.44             | 0.184      |                                                          | 428.47 | het      |
| chr2  | 25467077  | C   | A   | DNMT3A | missense          | c.1798G>T   | p.Asp600Tyr    | LT13N  | Oncogene/ Tier3     | 0.505            | 0.159      | DNAMT inhibitors                                         | 61.321 | het      |
| chr16 | 68835680  | T   | C   | CDH1   | missense          | c.271T>C    | p.Phe91Leu     | LT20N  | TSG/ Tier3          | 0.247            | 0.124      |                                                          | 27.86  | het      |
| chr17 | 41244492  | A   | G   | BRCA1  | missense          | c.3056T>C   | p.Ile1019Thr   | LT18N  | TSG/ Tier3          | 0.375            | 0.114      | PARP Inhibitor                                           | 51.21  | het      |
| chr4  | 1806131   | T   | C   | FGFR3  | missense          | c.1156T>C   | p.Phe386Leu    | LT10N  | Oncogene/ Tier3     | 0.334            | 0.107      | FGFR Inhibitors                                          | 327.25 | het      |
| chr17 | 41245449  | A   | G   | BRCA1  | missense          | c.2099T>C   | p.Leu700Pro    | LT20N  | TSG/ Tier3          | 0.361            | 0.107      | PARP Inhibitor                                           | 26.79  | het      |
| chr17 | 41244435  | T   | C   | BRCA1  | missense          | c.3113A>G   | p.Glu1038Gly   | LT10N  | TSG/ Tier4          | 0.389            | 0.103      | PARP Inhibitor                                           | 219.6  | het      |
| chr13 | 32914236  | C   | T   | BRCA2  | missense          | c.5744C>T   | p.Thr1915Met   | LT20N  | TSG/ Tier4          | 0.177            | 0.09       | PARP Inhibitor                                           | 50.386 | het      |
| chr10 | 123353264 | G   | T   | FGFR2  | missense          | c.68C>A     | p.Pro23His     | LT19N  | Oncogene/ Tier3     | 0.509            | 0.08       | FGFR Inhibitors                                          | 338.06 | het      |
| chr7  | 55268896  | C   | A   | EGFR   | missense          | c.2962C>A   | p.His988Asn    | LT19N  | Oncogene/ Tier3     | 0.228            | 0.077      | Erlotinib, Gefitinib, EGFR Inhibitors                    | 384.98 | het      |
| chr11 | 108128247 | A   | G   | ATM    | missense          | c.2290A>G   | p.Lys764Glu    | LT18N  | TSG/ Tier3          | 0.206            | 0.065      | PARP Inhibitors                                          | 27.487 | het      |
| chr4  | 1801029   | G   | C   | FGFR3  | missense          | c.158G>C    | p.Ser53Thr     | LT20N  | Oncogene/ Tier3     | 0.191            | 0.065      | FGFR Inhibitors                                          | 326.43 | het      |
| chr11 | 108160516 | A   | G   | ATM    | missense          | c.4424A>G   | p.Tyr1475Cys   | LT18N  | TSG/ Tier3          | 0.184            | 0.06       | PARP Inhibitors                                          | 345.71 | het      |
| chr2  | 202149589 | G   | C   | CASP8  | missense          | c.853G>C    | p.Asp285His    | LT20N  | TSG/ Tier4          | 0.4              | 0.055      |                                                          | 519.13 | het      |
| chr11 | 108098404 | A   | G   | ATM    | missense          | c.53A>G     | p.Asp18Gly     | LT18N  | TSG/ Tier3          | 0.161            | 0.049      | PARP Inhibitors                                          | 20.21  | het      |
| chr11 | 108115522 | A   | G   | ATM    | missense          | c.670A>G    | p.Lys224Glu    | LT20N  | TSG/ Tier3          | 0.11             | 0.047      | PARP Inhibitors                                          | 22.725 | het      |
| chr6  | 106553096 | G   | A   | PRDM1  | missense          | c.1061G>A   | p.Ser354Asn    | LT11N  | TSG/ Tier4          | 0.071            | 0.043      |                                                          | 1232.1 | het      |
| chr6  | 106536253 | G   | A   | PRDM1  | missense          | c.220G>A    | p.Gly74Ser     | LT10N  | TSG/ Tier4          | 0.082            | 0.039      |                                                          | 400.34 | het      |
| chr8  | 128751016 | G   | A   | MYC    | missense          | c.553G>A    | p.Val185Ile    | LT16N  | Oncogene/ Tier4     | 0.039            | 0.013      |                                                          | 473.5  | het      |

|                    |     |   |       |             |                    |                     |       |                    |  |  |                                                                        |        |            |
|--------------------|-----|---|-------|-------------|--------------------|---------------------|-------|--------------------|--|--|------------------------------------------------------------------------|--------|------------|
| chr18<br>60985780  | CG  | - | BCL2  | frameshift  | c.119_120del       | p.Pro40ArgfsTer112  | LT10N | Oncogene/<br>Tier3 |  |  | BCL2<br>inhibitors                                                     | 296.3  | het        |
| chr19<br>10265311  | GT  | C | DNMT1 | frameshift  | c.1782_1783delinsG | p.Cys596AlafsTer5   | LT10N | Oncogene/<br>Tier3 |  |  |                                                                        | 805.93 | het        |
| chr3<br>138665029  | G   | - | FOXL2 | frameshift  | c.536del           | p.Ala179GlyfsTer92  | LT11N | Oncogene/<br>Tier3 |  |  |                                                                        | 559.19 | het        |
| chr12<br>49432424  | ACG | C | KMT2D | frameshift  | c.8713_8715delinsG | p.Arg2905ValfsTer6  | LT11N | TSG/<br>Tier2      |  |  |                                                                        | 20.426 | het/4.76%  |
| chr12<br>121432117 | G   | - | HNF1A | frameshift  | c.864del           | p.Pro291GlnfsTer51  | LT16N | TSG/<br>Tier3      |  |  |                                                                        | 1165.2 | het        |
| chr12<br>121432118 | C   | - | HNF1A | frameshift  | c.872del           | p.Pro291GlnfsTer51  | LT16N | TSG/<br>Tier3      |  |  |                                                                        | 1165.2 | het        |
| chr12<br>49438036  | T   | - | KMT2D | frameshift  | c.5135del          | p.Lys1712ArgfsTer10 | LT17N | TSG/<br>Tier2      |  |  |                                                                        | 27.648 | het/10.29% |
| chr1<br>115251216  | T   | - | NRAS  | frameshift  | c.510del           | p.Lys170AsnfsTer19  | LT18N | Oncogene/<br>Tier3 |  |  | Vemurafenib,<br>Dabrafenib,<br>RAF<br>inhibitors,<br>MEK<br>inhibitors | 21.275 | het        |
| chr11<br>108190679 | A   | G | ATM   | splice_site | c.6348-2A>G        |                     | LT20N | TSG/<br>Tier1      |  |  | PARP<br>Inhibitors                                                     | 23.197 | het/4.11%  |



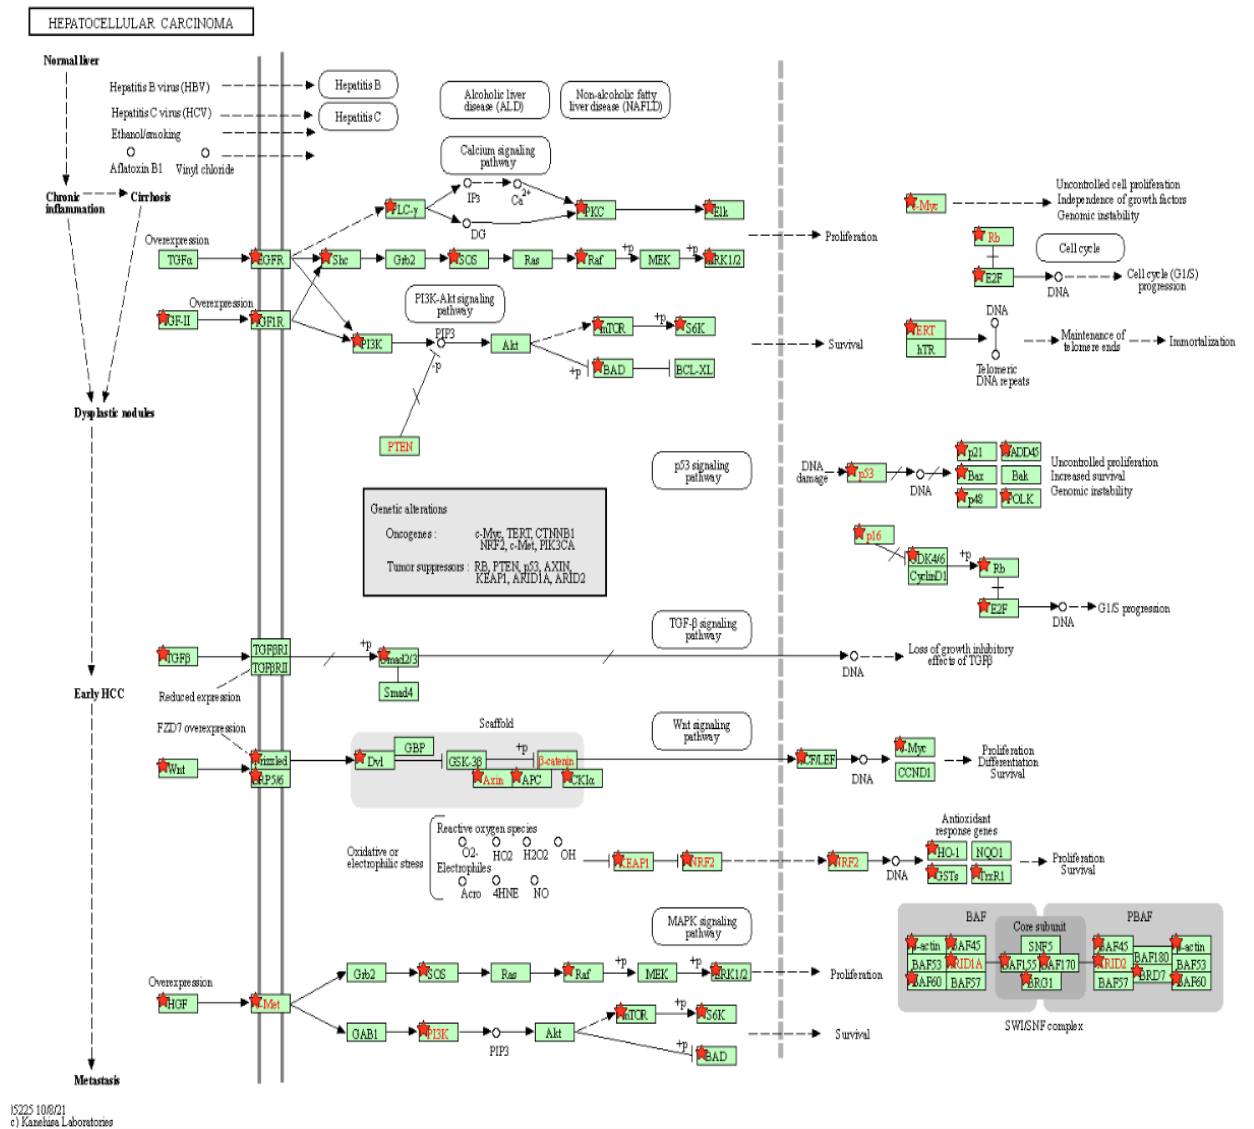

Figure (8): Hepatocellular carcinoma pathway: Genes written in red are disease associated gene variants, red stars are genes having pathogenic mutations in our HCC samples (27)

Sherman, B.T., Hao, M., Qiu, J., Jiao, X., Baseler, M.W., Lane, H.C., Imamichi, T. and Chang W. (2022): DAVID: a web server for functional enrichment analysis and functional annotation of gene lists (2021 update). *Nucleic Acids Research*. 50(W1):W216-W221. doi:10.1093/nar/gkac194.

Supplement Table (10): Tier1 and Tier2 variants in HCC and Non-HCC samples (GRCH37) all heterozygous, population frequency <0.1, HP= homopolymers regions.

|    | Variant                                     | Position           | Sequence ontology/<br>VAF | ACMG category | HCC LT/Non-HCC LTN (VAF)        |
|----|---------------------------------------------|--------------------|---------------------------|---------------|---------------------------------|
| 1  | TP53<br>c.422G>A<br>NM_000546.6             | chr17<br>7578508   | Missense                  | Tier1         | LT19 (22.95%)                   |
| 2  | CDKN2A<br>c.95T>A<br>NM_000077.5            | chr9<br>21974732   | Missense                  | Tier1         | LT14 (7.14%)                    |
| 3  | MSH2<br>c.56del<br>NM_000251.3              | chr2<br>47630385   | Frameshift                | Tier2         | LT13 (18.18%)                   |
| 4  | KMT2D<br>c.8713_8715delinsG<br>NM_003482.4  | chr12<br>49432424  | Frameshift                | Tier2 HP      | LT11N (4.76%)                   |
| 5  | KMT2D<br>c.5135_5136del<br>NM_003482.4      | chr12<br>4943803   | Frameshift                | Tier2 HP      | LT11N (3.86%)                   |
| 6  | KMT2D<br>c.5135del<br>NM_003482.4           | chr12<br>49438036  | Frameshift                | Tier2 HP      | LT17N (10.29%)                  |
| 7  | ATM c.6348-2A>G<br>NM_000051.4              | chr11<br>108190679 | Splice site               | Tier1         | LT20N (4.11%)                   |
| 8  | KIT c.1621A>C<br>p.Met541Leu<br>NM_000222.3 | chr4:<br>55593464  | Missense                  | Tier2         | LT11, 18,19 (0.22, 0.43, 0.52%) |
| 9  | NOTCH1 c.6472G>A<br>NM_017617.5             | Chr9<br>139391719  | Missense                  | Tier1         | LT6 (2.42%)                     |
| 10 | NOTCH1 c.1947del<br>NM_017617.5             | Chr9<br>139409808  | Frameshift                | Tier1HP       | LT6 (5.56%)                     |
| 11 | ARID1A c.4899del<br>NM_006015.6             | Chr1<br>27101612   | Frameshift                | Tier2 HP      | LT06 (2.74%)                    |
| 12 | KIT c.520del<br>NM_000222.3                 | Chr4<br>55564628   | Frameshift                | Tier2 HP      | LT6 (3.64%)                     |
| 13 | NOTCH1<br>c.3146delinsCAG<br>NM_017617.5    | Chr9<br>139403347  | Frameshift                | Tier1 HP      | LT7 3.7%)                       |
| 14 | ARID1A c.4052dup<br>NM_006015.6             | Chr1<br>27100338   | Frameshift                | Tier2         | LT7 (3.49%)                     |
| 15 | KMT2D c.8455C>T<br>NM_003482.4              | Chr12<br>49432684  | Stop_gained               | Tier2         | LT7 (3.33%)                     |
| 16 | KMT2D c.3853dup<br>NM_003482.4              | Chr12<br>49443517  | Frameshift                | Tier2         | LT7 (3.92%)                     |
| 17 | KMT2D c.3553C>T<br>NM_003482.4              | Chr12<br>49443818  | Stop_gained               | Tier2         | LT7 (4.29%)                     |
| 18 | KMT2D c.9594del<br>NM_003482.4              | Chr12<br>49431544  | Frameshift                | Tier2HP       | LT7N (3.92%)                    |
| 19 | PIK3CA c.3140A>G<br>NM_006218.4             | Chr3<br>178952085  | Missense                  | Tier1         | LT10 (2.41%)                    |
| 20 | NOTCH1<br>c.3849_3850insG<br>NM_017617.5    | Chr9<br>139401219  | Frameshift                | Tier1         | LT10 (1.49%)                    |
| 21 | BAP1<br>c.688_689insG<br>NM_004656.4        | Chr3<br>52440364   | Frameshift                | Tier2         | LT10 (1.69%)                    |
| 22 | KMT2C c.14125dup<br>NM_170606.3             | Chr7<br>151842286  | Frameshift                | Tier2         | LT10 (2.9%)                     |
| 23 | KMT2C<br>c.11293_11294del<br>NM_170606.3    | Chr7<br>151859367  | Frameshift                | Tier2 HP      | LT10 (3.37%)                    |
| 24 | KMT2C<br>c.7241_7242insC                    | Chr7<br>151877119  | Frameshift                | Tier2         | LT10 (2.82%)                    |

|    |                                           |                    |            |          |                              |
|----|-------------------------------------------|--------------------|------------|----------|------------------------------|
|    | NM_170606.3                               |                    |            |          |                              |
| 25 | KMT2C<br>c.1084_1085insC<br>NM_170606.3   | chr7-<br>151962222 | Frameshift | Tier2    | LT10 (3.28%)                 |
| 26 | KMT2D c.6323dup<br>NM_003482.4            | Chr12<br>49435229  | Frameshift | Tier2 HP | LT10 (4.62%)                 |
| 27 | KMT2D<br>c.1309_1310insC<br>NM_003482.4   | Chr12<br>49446156  | Frameshift | Tier2    | LT10 (1.92%)                 |
| 28 | ARID1A<br>c.945_946insG<br>NM_006015.6    | Chr1<br>27023840   | Frameshift | Tier2 HP | LT10N (1.79%)                |
| 29 | CTNNB1 c.727dup<br>NM_001904.4            | Chr3<br>41267054   | Frameshift | Tier1    | LT10N (3.39%)                |
| 30 | PIK3CA<br>c.2732_2733del<br>NM_006218.4   | Chr3<br>178947857  | Frameshift | Tier1 HP | LT10N (1.92%)                |
| 31 | ATM c.6984dup<br>NM_000051.4              | Chr11<br>108198377 | Frameshift | Tier1 HP | LT10N (3.08%)                |
| 32 | PIK3CA c.888dup<br>NM_006218.4            | Chr3<br>178921404  | Frameshift | Tier1    | LT10N (3.92%)                |
| 33 | KMT2D c.7277dup<br>NM_003482.4            | Chr12<br>49434275  | Frameshift | Tier2    | LT10N (5.17%)                |
| 34 | KMT2D c.5015dup<br>NM_003482.4            | Chr12<br>49438253  | Frameshift | Tier2 HP | LT10N (3.09%)                |
| 35 | KMT2D c.3660dup<br>NM_003482.4            | Chr12<br>49443710  | Frameshift | Tier2 HP | LT10N (3.77%)                |
| 36 | KMT2D<br>c.1676_1677insC<br>NM_003482.4   | Chr12<br>49445789  | Frameshift | Tier2    | LT10N (1.54%)                |
| 37 | EGFR c.1437dup<br>NM_005228.5             | Chr7<br>55227966   | Frameshift | Tier1 HP | LT10N (3.45%)                |
| 38 | EGFR c.797dup<br>NM_005228.5              | Chr7<br>55221749   | Frameshift | Tier1 HP | LT10N (2.33%), LT18N (1.67%) |
| 39 | SMARCA4<br>c.2689_2690insG<br>NM_003072.5 | Chr19<br>11132474  | Frameshift | Tier2    | LT10N (3.13%)                |
| 40 | ARID1A<br>c.926delinsCAG<br>NM_006015.6   | Chr1<br>27023820   | Frameshift | Tier2 HP | LT10N (1.75%)                |
| 41 | KMT2C<br>c.3156_3157insG<br>NM_170606.3   | Chr7<br>151921521  | Frameshift | Tier2    | LT10N (1.69%)                |
| 42 | KMT2C c.885dup<br>NM_170606.3             | Chr7<br>151970916  | Frameshift | Tier2    | LT10N (2.86%)                |
| 14 | PIK3CA<br>c.1325_1326insG<br>NM_006218.4  | Chr3<br>178928048  | Frameshift | Tier1    | LT11 (3.57%)                 |
| 43 | NOTCH1 c.3153dup<br>NM_017617.5           | Chr9<br>139403339  | Frameshift | Tier1    | LT11 (3.33%)                 |
| 44 | KMT2C c.4996dup<br>NM_170606.3            | Chr7<br>151884358  | Frameshift | Tier2 HP | LT11 (3.13%)                 |
| 45 | KMT2C c.1783dup<br>NM_170606.3            | Chr7<br>151946990  | Frameshift | Tier2 HP | LT13 (3.28%)                 |
| 46 | RBI c.2443dup<br>NM_000321.3              | Chr13<br>49039455  | Frameshift | Tier2 HP | LT11 (5.97%)                 |
| 47 | SMARCA4<br>c.153_154insC<br>NM_003072.5   | Chr19<br>11094981  | Frameshift | Tier2    | LT11 (2.53%)                 |
| 48 | SMARCA4<br>c.3326_3327insC<br>NM_003072.5 | Chr19<br>11138571  | Frameshift | Tier2    | LT11 (1.85%)                 |
| 49 | ATM c.1171_1172insG<br>NM_000051.4        | Chr11<br>108119765 | Frameshift | Tier1    | LT11 (1.59%)                 |
| 50 | ATM c.8668_8669insG<br>NM_000051.4        | Chr11<br>108218089 | Frameshift | Tier1    | LT11 (1.82%)                 |

|    |                                                    |                    |            |          |               |
|----|----------------------------------------------------|--------------------|------------|----------|---------------|
| 51 | <i>KIT</i> c.1149dup<br>NM 000222.3                | Chr4<br>55575619   | Frameshift | Tier1 HP | LT11N (4.76%) |
| 52 | <i>ARID1A</i><br>c.880delinsCAC<br>NM 006015.6     | Chr1<br>27023774   | Frameshift | Tier2 HP | LT11N (2.42%) |
| 53 | <i>ARID1A</i> c.1545dup<br>NM 006015.6             | Chr1<br>27057836   | Frameshift | Tier2    | LT11N (3.28%) |
| 54 | <i>KMT2c</i> c.10061dup<br>NM 170606.3             | Chr7<br>151860600  | Frameshift | Tier2 HP | LT11N (3.28%) |
| 55 | <i>KMT2c</i> c.9267dup<br>NM 170606.3              | Chr7<br>151871322  | Frameshift | Tier2 HP | LT11N (2.17%) |
| 56 | <i>KMT2D</i><br>c.9279_9280insG<br>NM 003482.4     | Chr12<br>49431859  | Frameshift | Tier2    | LT11N (2.2%)  |
| 57 | <i>KMT2D</i><br>c.8713_8715delinsG<br>NM 003482.4  | Chr12<br>49432424  | Frameshift | Tier2 HP | LT11N (4.76%) |
| 58 | <i>KMT2D</i><br>c.7259_7260insT<br>NM 003482.4     | Chr12<br>49434293  | Frameshift | Tier2    | LT11N (1.45%) |
| 59 | <i>KMT2D</i><br>c.5135_5136del<br>NM 003482.4      | Chr12<br>49438034  | Frameshift | Tier2 HP | LT11N (3.86%) |
| 60 | <i>SMARCA4</i><br>c.3148_3149insC<br>NM 003072.5   | Chr19<br>11136165  | Frameshift | Tier2    | LT11N (1.85%) |
| 61 | <i>KMT2D</i> c.4085dup<br>NM 003482.4              | Chr12<br>49442487  | Frameshift | Tier2 HP | LT11N (3.85%) |
| 62 | <i>SMARCA4</i><br>c.3392del<br>NM 003072.5         | Chr 19<br>11141415 | Frameshift | Tier2    | LT13 (7.73%)  |
| 63 | <i>TSC1</i><br>c.2672del<br>NM 000368.5            | Chr9<br>135772951  | Frameshift | Tier2 HP | LT13 (9.2%)   |
| 64 | <i>ARID1A</i> c.3344del<br>NM 006015.6             | Chr1<br>27097751   | Frameshift | Tier2 HP | LT13 (2.16%)  |
| 65 | <i>ARID1A</i><br>c.4555_4557delinsA<br>NM 006015.6 | Chr1<br>27101273   | Frameshift | Tier2 HP | LT13 (1.65%)  |
| 66 | <i>ARID1A</i><br>c.4668_4669insG<br>NM 006015.6    | Chr1<br>27101387   | Frameshift | Tier2    | LT13 (1.59%)  |
| 67 | <i>KMT2D</i> c.11147del<br>NM 003482.4             | Chr12<br>49427340  | Frameshift | Tier2 HP | LT13 (1.59%)  |
| 68 | <i>KMT2D</i> c.2585dup<br>NM 003482.4              | Chr12<br>49444880  | Frameshift | Tier2 HP | LT13 (3.49%)  |
| 69 | <i>NOTCH1</i> c.6373C>T<br>NM 017617.5             | Chr9<br>139391818  | Missense   | Tier1    | LT13N (2.16%) |
| 70 | <i>CTNNB1</i> c.1444dup<br>NM 001904.4             | Chr3<br>41275276   | Frameshift | Tier1 HP | LT14 (3.61%)  |
| 71 | <i>CDKN2A</i> c.64_65del<br>NM 000077.5            | chr9<br>21974762   | Frameshift | Tier1 HP | LT14 (2.9%)   |
| 72 | <i>PIK3CA</i> c.349dup<br>NM_006218.4              | Chr3<br>178916959  | Frameshift | Tier1    | LT14 (2.25%)  |
| 73 | <i>NOTCH1</i> c.809del<br>NM 017617.5              | Chr9<br>139413950  | Frameshift | Tier1 HP | LT14 (5%)     |
| 74 | <i>KMT2C</i> c.6836dup<br>NM 170606.3              | Chr7<br>151878108  | Frameshift | Tier2 HP | LT14 (2.86%)  |
| 75 | <i>KMT2D</i><br>c.15838_15839insC<br>NM 003482.4   | Chr12<br>49418675  | Frameshift | Tier2    | LT14 (1.75%)  |
| 76 | <i>RBI</i> c.1848dup<br>NM 000321.3                | Chr13<br>49030367  | Frameshift | Tier2 HP | LT14 (5.15%)  |
| 77 | <i>SMARCA4</i><br>c.1834_1835insG<br>NM_003072.5   | Chr19<br>11113727  | Frameshift | Tier2    | LT14 (1.85%)  |
| 78 | <i>ATM</i> c.3548dup<br>NM 000051.4                | Chr11<br>108151865 | Frameshift | Tier1    | LT14 (3.85%)  |

|     |                                                   |                    |            |          |                             |
|-----|---------------------------------------------------|--------------------|------------|----------|-----------------------------|
| 79  | ATM<br>c.3565_3566insCT<br>NM_000051.4            | Chr11<br>108151884 | Frameshift | Tier1 HP | LT14 (2%)                   |
| 80  | ATM c.3552_3553insC<br>NM_000051.4                | Chr11<br>108151871 | Frameshift | Tier1    | LT14N (2.5%)                |
| 81  | NOTCH1 c.5806dup<br>NM_017617.5                   | Chr9<br>139395131  | Frameshift | Tier1    | LT16 (3.7%)                 |
| 82  | ATM c.6998dup<br>NM_000051.4                      | Chr11<br>108198393 | Frameshift | Tier1    | LT16 (4.29%)                |
| 83  | KMT2C<br>c.13365_13366insC<br>NM_170606.3         | Chr7<br>151845646  | Frameshift | Tier2    | LT16 (1.82%)                |
| 84  | KMT2C c.10405del<br>NM_170606.3                   | Chr7<br>151860256  | Frameshift | Tier2 HP | LT16 (2.63)                 |
| 85  | KMT2D c.11468dup<br>NM_003482.4                   | Chr12<br>49427019  | Frameshift | Tier2 HP | LT16 (3.45%)                |
| 86  | KMT2D c.11386dup<br>NM_003482.4                   | Chr12<br>49427101  | Frameshift | Tier2 HP | LT16 (4%)                   |
| 87  | EGFR<br>c.1462_1465delinsCC<br>NM_005228.5        | Chr7<br>55227995   | Frameshift | Tier1 HP | LT16N (2.08%)               |
| 88  | ATM c.8682dup<br>NM_000051.4                      | Chr11<br>108224499 | Frameshift | Tier1 HP | LT16N (3%)                  |
| 89  | ARID1A c.6341del<br>NM_006015.6                   | Chr1<br>27106726   | Frameshift | Tier2 HP | LT16N (3.64%)               |
| 90  | KMT2c c.8808dup<br>NM_170606.3                    | Chr7<br>151873729  | Frameshift | Tier2 HP | LT16N (3.33%)               |
| 91  | KMT2c<br>c.11602_11605delins<br>GG<br>NM_170606.3 | Chr7<br>151856013  | Frameshift | Tier2 HP | LT16N (1.92%)               |
| 92  | KMT2D<br>c.7306_7308delinsG<br>NM_006015.6        | Chr12<br>49434245  | Frameshift | Tier2 HP | LT16N (2.83%)               |
| 93  | KMT2D c.2803dup<br>NM_006015.6                    | Chr12<br>49444567  | Frameshift | Tier2 HP | LT16N (3.51)                |
| 94  | KMT2D<br>c.1473_1474insG<br>NM_006015.6           | Chr12<br>49445992  | Frameshift | Tier2    | LT16N (1.92%)               |
| 95  | NOTCH1<br>c.3763_3764insC<br>NM_017617.5          | Chr9<br>139401305  | Frameshift | Tier1    | LT17 (2.82%)                |
| 96  | NOTCH1 c.3587del<br>NM_017617.5                   | Chr9<br>139401812  | Frameshift | Tier1 HP | LT17 (5%)                   |
| 97  | NOTCH1<br>c.2812_2813insCG<br>NM_017617.5         | Chr9<br>139404341  | Frameshift | Tier1 HP | LT17 (1.92%)                |
| 98  | NOTCH1 c.2072del<br>NM_017617.5                   | chr9-<br>139409096 | Frameshift | Tier1 HP | LT17 (7.14%)                |
| 99  | KMT2c c.14345G>A<br>NM_170606.3                   | Chr7<br>151836875  | Missense   | Tier2 HP | LT17 (2.78%)                |
| 100 | KMT2D c.7282dup<br>NM_006015.6                    | Chr12<br>49434270  | Frameshift | Tier2 HP | LT17 (5.36%)                |
| 101 | KMT2D c.5135del<br>NM_006015.6                    | Chr12<br>49438035  | Frameshift | Tier2 HP | LT17N (10.29%)              |
| 102 | KMT2D<br>c.3417_3418insC<br>NM_006015.6           | Chr12<br>49443953  | Frameshift | Tier2    | LT17N (1.47%)               |
| 103 | SMARCA4<br>c.810dup<br>NM_003072.5                | Chr19<br>11097631  | Frameshift | Tier2HP  | LT11N,18N (3.06%,<br>7.25%) |
| 104 | KMT2c<br>c.574delinsACA<br>NM_170606.3            | Chr7<br>152012239  | Frameshift | Tier2    | LT18 (2.14%)                |
| 105 | RBI c.1578del<br>NM_000321.3                      | Chr13<br>48955460  | Frameshift | Tier2    | LT18 (3.85%)                |
| 106 | ATM c.6885dup<br>NM_000051.4                      | Chr11<br>108196860 | Frameshift | Tier1    | LT18 (3.77%)                |

|     |                                                           |                     |             |       |               |
|-----|-----------------------------------------------------------|---------------------|-------------|-------|---------------|
| 107 | <i>KMT2c</i> c.10918dup<br>NM 170606.3                    | Chr7<br>151859743   | Frameshift  | Tier2 | LT18N (3.77%) |
| 108 | <i>KMT2c</i><br>c.10291_10292insG<br>NM 170606.3          | Chr7<br>151860370   | Frameshift  | Tier2 | LT18N (1.56%) |
| 109 | <i>ATM</i> c.5870_5871insC<br>NM 000051.4                 | Chr11<br>108180994  | Frameshift  | Tier1 | LT18N (3.17%) |
| 110 | <i>ATM</i> c.5883_5884insC<br>NM 000051.4                 | chr11-<br>108181007 | Frameshift  | Tier1 | LT18N (1.59%) |
| 111 | <i>PTEN</i> c.812T>C<br>NM 000314.8                       | chr10<br>89720661   | Missense    | Tier2 | LT18N (2.78%) |
| 112 | <i>EGFR</i><br>c.797del<br>NM 005228.5                    | Chr7<br>55221748    | Frameshift  | Tier1 | LT18N (6.67%) |
| 113 | <i>PIK3CA</i><br>c.2196_2197insT<br>NM 006218.4           | Chr3<br>178941878   | Frameshift  | Tier1 | LT19 (1.45%)  |
| 114 | <i>CTNNB1</i><br>c.839_840insT<br>NM 001904.4             | Chr3<br>41267256    | Frameshift  | Tier1 | LT19 (1.92%)  |
| 115 | <i>KMT2D</i> c.3190dup<br>NM 006015.6                     | Chr12<br>49444180   | Frameshift  | Tier2 | LT19 (3.57%)  |
| 116 | <i>MSH2</i> c.577C>T<br>NM 000251.3                       | Chr2<br>47637443    | Stop_gained | Tier2 | LT19 (2.78%)  |
| 117 | <i>ATM</i> c.5156_5157insG<br>NM 000251.3                 | Chr11<br>108170591  | Frameshift  | Tier1 | LT19N (1.85%) |
| 118 | <i>BAP1</i><br>c.201dup<br>NM 004656.4                    | Chr3<br>52442545    | Frameshift  | Tier2 | LT19N (3.77%) |
| 119 | <i>BAP1</i><br>c.140_141insG<br>NM 004656.4               | Chr3<br>52442605    | Frameshift  | Tier2 | LT19N (1.79%) |
| 120 | <i>KMT2c</i> c.10822dup<br>NM 170606.3                    | Chr7<br>151859839   | Frameshift  | Tier2 | LT19N (3.33%) |
| 121 | <i>KMT2D</i><br>c.11858_11859insC<br>NM 006015.6          | Chr12<br>49426629   | Frameshift  | Tier2 | LT19N (1.79%) |
| 123 | <i>KMT2c</i> c.7843dup<br>NM 170606.3                     | Chr7<br>151874694   | Frameshift  | Tier2 | LT19N (3.7%)  |
| 124 | <i>KMT2D</i> c.3704del<br>NM 006015.6                     | Chr12<br>49443666   | Frameshift  | Tier2 | LT19N (3.31%) |
| 125 | <i>RBI</i> c.1237delinsAGA<br>NM 000321.3                 | Chr13<br>48951075   | Frameshift  | Tier2 | LT19N (3.23%) |
| 126 | <i>ATM</i> c.2831_2832insC<br>NM 000051.4                 | Chr11<br>108139329  | Frameshift  | Tier1 | LT20 (1.72%)  |
| 127 | <i>PTEN</i><br>c.447_448insC<br>NM 000314.8               | Chr10<br>89692963   | Frameshift  | Tier1 | LT20 (1.85%)  |
| 128 | <i>KMT2D</i> c.14216dup<br>NM 006015.6                    | Chr12<br>49422878   | Frameshift  | Tier2 | LT20 (4.12%)  |
| 129 | <i>KMT2D</i><br>c.8262_8263insG<br>NM 006015.6            | Chr12<br>49433108   | Frameshift  | Tier2 | LT20 (1.64%)  |
| 130 | <i>ATM</i> c.6874C>T<br>NM 000051.4                       | Chr11<br>108196851  | Stop-gained | Tier1 | LT20N (1.80)  |
| 131 | <i>ATM</i> c.8397dup<br>NM 000051.4                       | Chr11<br>108214074  | Frameshift  | Tier1 | LT20N (3.85%) |
| 132 | <i>ARID1A</i> c.1732del<br>NM 006015.6                    | Chr1<br>27058023    | Frameshift  | Tier2 | LT20N (1.79%) |
| 133 | <i>ARID1A</i><br>c.4060_4061delinsCT<br>TC<br>NM 006015.6 | Chr1<br>27100348    | Frameshift  | Tier2 | LT20N (3.33%) |
| 134 | <i>KMT2D</i><br>c.2658delinsCTG<br>NM 006015.6            | Chr12<br>49444808   | Frameshift  | Tier2 | LT20N (2.91%) |
| 135 | <i>PTCH1</i><br>c.1963C>T<br>NM_000264.5                  | Chr9<br>98231320    | Stop-gained | Tier1 | LT7N (3.23%)  |

|     |                                                                                                          |                    |            |       |                                                                                            |
|-----|----------------------------------------------------------------------------------------------------------|--------------------|------------|-------|--------------------------------------------------------------------------------------------|
| 136 | <i>PTCH1</i><br>c.1595_1596del<br>NM_000264.5                                                            | Chr9<br>98239046   | Frameshift | Tier1 | LT10 (3.19%)                                                                               |
| 137 | <i>PTCH1</i><br>c.2523_2524insG<br>NM_000264.5                                                           | Chr9<br>98229435   | Frameshift | Tier1 | LT10N (2.82%)                                                                              |
| 138 | <i>PTCH1</i><br>c.1898dup<br>NM_000264.5                                                                 | Chr9<br>98231385   | Frameshift | Tier1 | LT11 (3.61%)                                                                               |
| 139 | <i>PTCH1</i><br>c.2100_2101insC<br>NM_000264.5                                                           | Chr9<br>98231183   | Frameshift | Tier1 | LT14 (1.89%)                                                                               |
| 140 | <i>PTCH1</i><br>c.3679dup<br>NM_000264.5                                                                 | Chr9<br>98211476   | Frameshift | Tier1 | LT14N (3.09%)                                                                              |
| 141 | <i>PTCH1</i><br>c.1469dup<br>NM_000264.5                                                                 | Chr9<br>98239863   | Frameshift | Tier1 | LT16 (2.82%)                                                                               |
| 142 | <i>PTCH1</i><br>c.4200_4201insG                                                                          | Chr9<br>98209338   | Frameshift | Tier1 | LT17N (1.85%)                                                                              |
| 143 | <b><i>FLT3</i> c.680C&gt;T</b><br><b>p.Thr227Met</b><br>NM_004119.3<br><b>Common in HCC and Non-HCC</b>  | chr13<br>28624294  | Missense   | Tier2 | LT10 (100%); LT11 (81%); LT14 (50%); LT16 (100%); LT20 (46%)<br>LT10N (100%); LT16N (100%) |
| 144 | <b><i>GSTP1</i> c.313A&gt;G</b><br><b>p.Ile105Val</b><br>NM_000852.4<br><b>Common in HCC and Non-HCC</b> | chr11:<br>67352689 | Missense   | Tier1 | HCC and Non-HCC 16 (53, 44%), 18 (54%), 20 (52%), HCC 6 (59%) Non-HCC 17 (57%)             |
